# Supplementary material for: Adenosine diphosphate involvement in THP-1 maturation triggered by the contact allergen 1-fluoro-2,4-dinitrobenzene
Source: Royal Society of Chemistry journal article supplement (doi:10.1039/c6tx00240d), 2016-01-01
Supplement: c6tx00240d1.pdf [file c6tx00240d1.pdf]

**Supplementary Table 1 Primer sequences for studied genes**

| <b>Gene Symbol</b> | <b>5' – 3' sequence<br/>F: Forward; R: Reverse</b>    | <b>RefSeq ID</b> |
|--------------------|-------------------------------------------------------|------------------|
| <b>IL1B</b>        | F: GCTTGGTGATGTCTGGTC<br>R: GCTGTAGAGTGGGCTTATC       | NM_000576        |
| <b>IL8</b>         | F: CTTTCAGAGACAGCAGAG<br>R: CTAAGTTCTTTAGCACTCC       | NM_000584        |
| <b>TNF</b>         | F: AGAAGACCTCACCTAGAA<br>R: TCTCAAGGAAGTCTGGAA        | NM_000594        |
| <b>CD40</b>        | F: TGATAGTGAACAACCTGGAA<br>R: CCATAGGCAATATACATACATAA | NM_001250        |
| <b>CD83</b>        | F: ATTGAGTCATTATCCTTGCTAT<br>R: GCTTCTTGGTAACTTCTT    | NM_004233        |
| <b>CD86</b>        | F: GAACCTAAGAAGATGAGT<br>R: TCCAGAATACAGAAGATG        | NM_175862        |
| <b>CCR7</b>        | F: GTGGCTCTCCTTGTCATT<br>R: GGTGTTGTCTCCGATGTA        | NM_001838        |
| <b>CXCR4</b>       | F: GAGGAGAGTTGTAGGATT<br>R: GGTGTAGTTATCTGAAGTG       | NM_001008540     |
| <b>HMOX1</b>       | F: CCTGAGTTTCAAGTATCC<br>R: AACAAACAGAACACAACAA       | NM_002133        |
| <b>P2XR7</b>       | F: AACCACATTGCTATCTTA<br>R: CTGAGAACATTAGAACCA        | NM_002562        |
| <b>P2YR2</b>       | F: GCTCAGGATATTTCACTCT<br>R: CCCAACTTATACACACAAA      | NM_176072        |
| <b>P2Y11</b>       | F: TCAGCAGATGAGCTTGAAC<br>R: CTTTCCACCCACGTTTCC       | NM_002566        |

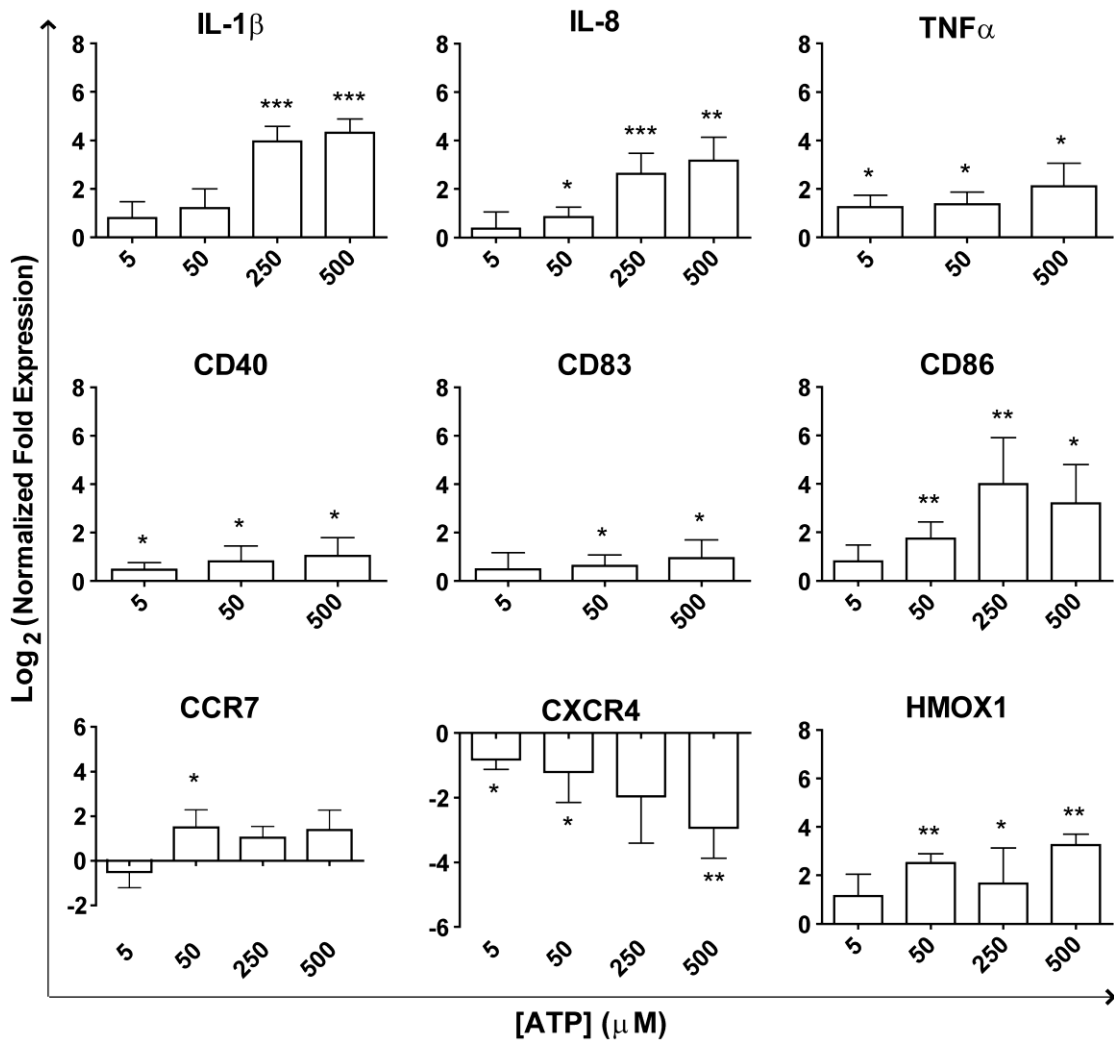

**Supplementary Fig. 1** Extracellular ATP induces alterations in THP1 cells mRNA profile. Cells were incubated for 6h with 5, 50, 250 and 500 μM ATP. The total RNA was extracted and retrotranscribed as described in material and methods. The mRNA levels of different cytokines (IL-1β, IL-8 and TNFα), maturation markers (CD40, CD83 and CD86), chemokine receptors (CCR7 and CXCR4) and of the electrophilic stress response enzyme HMOX1 are depicted as log<sub>2</sub> of the normalized fold expression (see material and methods). GAPDH was used as reference gene. Mean values and standard deviation of at least 3 independent experiments are shown. One-way ANOVA with Tukey post-test was used to compare the results relatively to control (untreated cells; log<sub>2</sub>=0). \* *p*<0.05; \*\* *p*<0.01; \*\*\* *p*<0.001.
